# Supplementary material
Source: Springer Nature journal article supplement (https://www.springermedizin.de/resource/supplementary/13075_2011_3493_MOESM1_ESM.pdf/9694564)
Supplement: MOESM1 [file 9694564]

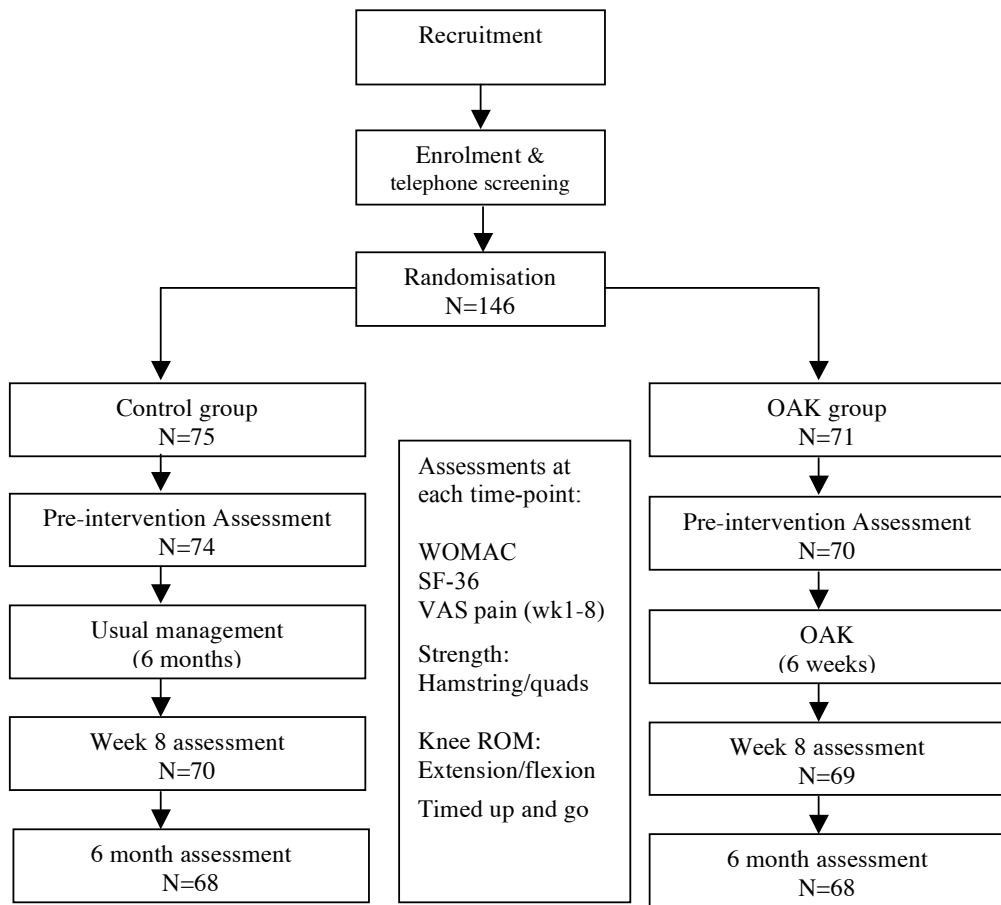

Figure 1: Study Design Flow Chart and evaluation tools used at each assessment. N=number of participants included in the data analyses. This includes values from returned posted questionnaires from non-attendees and last value carried forward for other missing data.
